# Supplementary material for: Human Species D Adenoviruses Isolated from Diarrheal Feces Show Low Infection Rates in Primary Nasal Epithelial Cells
Source: MDPI journal article supplement (doi:10.3390/children8070563), 2021-06-30
Supplement: s1 [file s1]

# Supplementary

## Luciferase-Assay (*n* = 3 biological replicates, incl. each *n*=9 technical replicates; for Fig. 1a)

| Untreated  | Ad 5      | Ad 70      | Ad 73      | Ad74       |
|------------|-----------|------------|------------|------------|
| 14751.5556 | 1e+009*** | 4183912    | 3852397.56 | 1216761.22 |
| 2074.55556 | 1e+009*** | 4296697.67 | 4198274.56 | 1054824    |
| 3658.33333 | 1e+009*** | 7529933.44 | 9373573.38 | 2474471    |

\*\*\*values were over the measurable range as the software program can analyze it. Thus, these values of Ad 5 group are fictively listed (maximal values were chosen) and statistical analyses were not performed.

## GFP-FITC<sup>+</sup> total [%] (*n* = 3 biological replicates, for Fig. 1b, d)

| untreated | Ad 5  | Ad 70 | Ad 73 | Ad 74 |
|-----------|-------|-------|-------|-------|
| 0.09      | 51.24 | 3.2   | 4.18  | 0.85  |
| 0.07      | 50.7  | 3.94  | 5.49  | 1.05  |
| 0.06      | 49.05 | 2.9   | 3.28  | 0.49  |

## Quantitative PCR viral genomes (*n* = 3 biological replicates, incl. each *n*=3 technical replicates; for Fig. 1c)

| Untreated | Ad 5          | Ad 70      | Ad 73      | Ad 74       |
|-----------|---------------|------------|------------|-------------|
| 2691.2494 | 4338589.26796 | 703.91319  | 9854.36791 | 13072.64975 |
| 3.57551   | 3713829.80178 | 2007.77735 | 1421.54901 | 972.00962   |
| 4.44935   | 2503066.24905 | 343.02894  | 361.61384  | 286.37386   |

## CD46-PE [%] (*n* = 3 biological replicates; for Fig. 2a, b)

| untreated | Ad 5  | Ad 70 | Ad 73 | Ad 74 |
|-----------|-------|-------|-------|-------|
| 81.37     | 60.82 | 86.61 | 83.04 | 85.85 |
| 85.58     | 66.27 | 88.04 | 92.07 | 93.57 |
| 81.53     | 68.4  | 85.53 | 89.68 | 89.58 |

## CAR-PE [%] (*n* = 3 biological replicates; for Fig. 2a, b)

| untreated | Ad 5  | Ad 70 | Ad 73 | Ad 74 |
|-----------|-------|-------|-------|-------|
| 21.93     | 14.92 | 47.06 | 53.01 | 40.48 |
| 31.78     | 29.8  | 56.57 | 50.87 | 37.95 |
| 5.97      | 5.98  | 17.36 | 18.03 | 17.96 |

## IL-6 [pg/ml] (*n*=3 biological replicates, incl. each *n*=3 technical replicates; for Fig. 3)

| Untreated  | Ad 5       | Ad 70      | Ad 73      | Ad 74      |
|------------|------------|------------|------------|------------|
| 724.913333 | 526.506667 | 1201.95    | 1287.02333 | 1300.56667 |
| 2498.03    | 1417.17    | 2380.02    | 2050.55667 | 2951.07    |
| 2310.4     | 1023.09    | 1945.09333 | 2418.14    | 3014.16333 |
